# Supplementary material for: Viscous coupling at mid-oceanic ridges explaining puzzling Pacific Plate motions
Source: Research Square preprint supplement (doi:10.21203/rs.3.rs-8302131/v1), 2025-12-09
Supplement: Supplementary file 1 [file 629f4b05da950a56f821265e.docx]

Supplementary Figure 1


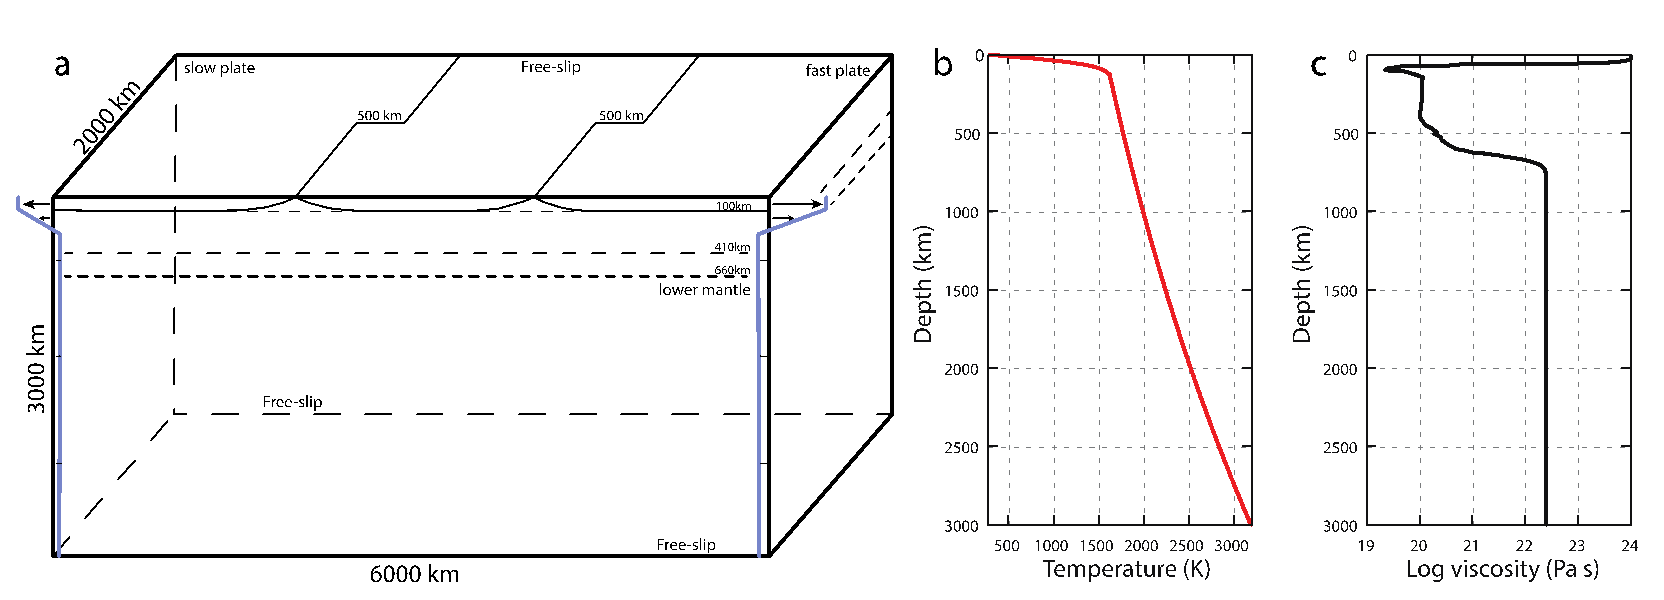


**a)** Cartoon of the model set up showing the extent of the domain and the initial location of the mid-oceanic ridges and transform faults. The blue lines represent the boundary velocity profile (not to scale) that is imposed on the entire left and right sides. **b)** Initial temperature profile and **c)** initial viscosity profile obtained away from a ridge.
