# Supplementary material for: Viscous coupling at mid-oceanic ridges explaining puzzling Pacific Plate motions
Source: Research Square preprint supplement (doi:10.21203/rs.3.rs-8302131/v1), 2025-12-09
Supplement: Supplementary file 2 [file e2f731ab559ca126ed622d31.docx]

Supplementary Table 1 - Modelling parameters

| **Global parameters** |  | | | | | | |
| --- | --- | --- | --- | --- | --- | --- | --- |
| Surface temperature (K) | 273 | | | | | | |
| Bottom temperature (K) | 3200 | | | | | | |
|  | *Oceanic lithosphere* | *Upper Mantle* | | | *Mantle transition zone* | | *Lower Mantle* |
| Reference density (kg m-3) | 3300 | 3300 | | | 3500 | | 3900 |
| Mantle thickness (km) | 3000 | | | | | | |
| Thermal expansivity (K-1) | 3x10-5 | | | | | | |
| Thermal diffusivity (m2 s-1) | 1x10--6 | | | | | | |
|  |  | | | | | | |
| Heat capacity (J kg-1 K-1) | 1250 | | | | | | |
| Radiogenic heating rate (W kg-1) | 5.44x10-12 | | | | | | |
| Minimum viscosity cut-off (Pa s) | 1x1018 | | | | | | |
| Maximum viscosity cut-off (Pa s) | 1x1024 | | | | | | |
|  | | | | | | | |
| **Viscosity parameters** | *Oceanic lithosphere* | | | *Lower Mantle* | | | |
| Constant viscosity (Pa s) | 1x1024 | | | 2.5x1022 | | | |
|  | | | | | | | |
| *Dislocation creep* | *MOR mantle* | | *Upper Mantle* | | | *Mantle transition zone* | |
| Prefactors – A (Pa-n s-1) | *See table 2* | | 6.51x10-16 | | | 8.51x10-17 | |
| Stress exponents – n | *See table 2* | | 3 | | | 3 | |
| Activation energies – E (J mol-1) | 500x103 | | 500x103 | | | 500x103 | |
| Activation volumes – V (m3 mol-1) | 1.2x10-5 | | 1.2x10-5 | | | 2.5x10-5 | |
| *Diffusion creep* |  | |  | | |  | |
| Prefactors – A Pa-1 s-1 | 6.00x10-17 | | 6.00x10-17 | | | 9.00x10-17 | |
| Activation energies - E) J mol-1 | 150x103 | | 150x103 | | | 155x103 | |
| Activation volumes – V m3 mol-1 | 6.34x10-7 | | 6.34x10-7 | | | 14.34x10-7 | |
| Cohesions – C (Mpa) | 20 | | | | | | |
| Angles of internal friction (degrees) | 20 | | | | | | |
|  | | | | | | | |
| **Phase transitions**  *between* | *100 km*  *Crust-MOR* | *100 km*  *MOR-UM* | | | *410 km*  *UP-MTZ* | | *660 km*  *MTZ-LM* |
| Reference temperatures (K) | 1200 | 1200 | | | 1600 | | 1800 |
| Clapeyron slopes (MPa K-1) | -3 | 0 | | | 2 | | -2.5 |
